# Supplementary material for: Insights into the cotranscriptional and translational control mechanisms of the Escherichia coli tbpA thiamin pyrophosphate riboswitch
Source: PubMed Central journal article supplement (PMC11487190; doi:10.1038/s42003-024-07008-5), 2024-10-17
Supplement: 42003_2024_7008_MOESM3_ESM.pdf [file 42003_2024_7008_MOESM3_ESM.pdf]

# Description of Additional Supplementary Files

**File name:** Supplementary Data

**Description:** The source data behind the graphs in the paper.
